# Supplementary material for: Metabolic Profiling and Transcriptional Analysis of Carotenoid Accumulation in a Red-Fleshed Mutant of Pummelo (Citrus grandis)
Source: MDPI journal article supplement (doi:10.3390/molecules27144595), 2022-07-19
Supplement: s1 [file s1]

**Table S5** DEGs involved in carotenoid accumulation

| Gene_id            | Gene name                                | FC(LA/CK) | Log2FC(LA/CK) | Pvalue   | Padjust  | Significant | Regulate |
|--------------------|------------------------------------------|-----------|---------------|----------|----------|-------------|----------|
| <b>Cg2g044950</b>  | NCED1, 9-cis-epoxycarotenoid dioxygenase | 11.132    | 3.476579      | 4.76E-15 | 1.55E-13 | yes         | up       |
| <b>Cg3g011400</b>  | ZDS1, Zeta-carotene desaturase           | 0.417     | -1.26349      | 0.00016  | 0.000798 | yes         | down     |
| <b>Cg3g021360</b>  | ABA 8'-hydroxylases 4                    | 3.12      | 1.641578      | 0.000301 | 0.001391 | yes         | up       |
| <b>Cg5g002300</b>  | CHYb, $\beta$ -carotene hydroxylase 2    | 0.489     | -1.03261      | 0.011767 | 0.032431 | yes         | down     |
| <b>Cg5g034750</b>  | $\beta$ -carotene isomerase D27          | 6.468     | 2.69343       | 0.004052 | 0.013295 | yes         | up       |
| <b>Cg5g044040</b>  | CCD7, Carotenoid cleavage dioxygenase 7  | 0.457     | -1.13093      | 5.5E-05  | 0.000311 | yes         | down     |
| <b>Cg6g001440</b>  | Protein LUTEIN DEFICIENT 5               | 2.202     | 1.138645      | 6.61E-07 | 5.68E-06 | yes         | up       |
| <b>Cg6g016720</b>  | PSY, phytoene synthase                   | 2.233     | 1.159279      | 0.000204 | 0.000988 | yes         | up       |
| <b>Cg6g020290</b>  | ABA 8'-hydroxylases 1                    | 0.137     | -2.871443     | 1.06E-09 | 1.53E-08 | yes         | down     |
| <b>Cg8g004210</b>  | ABA $\beta$ -glucosyltransferase         | 2.179     | 1.123607      | 0.001537 | 0.005773 | yes         | up       |
| <b>Cg8g022720</b>  | ABA 8'-hydroxylases 2                    | 0.319     | -1.649825     | 0.000835 | 0.003414 | yes         | down     |
| <b>CgUng001590</b> | LCYE, Lycopene epsilon cyclase           | 4.167     | 2.058897      | 4.41E-10 | 6.78E-09 | yes         | up       |
