# Supplementary material for: Metabolic Profiling and Transcriptional Analysis of Carotenoid Accumulation in a Red-Fleshed Mutant of Pummelo (Citrus grandis)
Source: MDPI journal article supplement (doi:10.3390/molecules27144595), 2022-07-19
Supplement: s1 [file s1]

**Table S1** quality analysis of transcriptome sequencing data

| sample name           | Raw reads | Clean reads | Error rate % | Q20 % | Q30 % | GC content % | Contrast ratio% |
|-----------------------|-----------|-------------|--------------|-------|-------|--------------|-----------------|
| <b>HJH Albedo 1</b>   | 41725292  | 41301096    | 0.0257       | 97.8  | 93.38 | 45.24        | 88.87           |
| <b>HJH Albedo 2</b>   | 50405050  | 49618582    | 0.0256       | 97.85 | 93.52 | 45.1         | 90.96           |
| <b>HJH Albedo 3</b>   | 44951404  | 44363436    | 0.0262       | 97.59 | 92.9  | 44.9         | 92.05           |
| <b>R-HJH Albedo 1</b> | 52446264  | 51948746    | 0.0257       | 97.79 | 93.38 | 44.52        | 93.12           |
| <b>R-HJH Albedo 2</b> | 49635476  | 49171630    | 0.026        | 97.7  | 93.14 | 44.83        | 92.7            |
| <b>R-HJH Albedo 3</b> | 47521580  | 47099778    | 0.0257       | 97.79 | 93.36 | 44.93        | 90.69           |
